# Supplementary material for: Influenza A virus evolution and spatio-temporal dynamics in Eurasian wild birds: a phylogenetic and phylogeographical study of whole-genome sequence data
Source: PubMed Central journal article supplement (PMC4681060; doi:10.1099/vir.0.000155), 2015-08

|                                            |                 |                 |                 |                 |                 |                 |                 |                 |
|--------------------------------------------|-----------------|-----------------|-----------------|-----------------|-----------------|-----------------|-----------------|-----------------|
| A/red-neckedstint/WesternAus/4094/84       | CY035897        | CY035896        | CY035895        | CY035890        | CY035893        | CY035892        | CY035891        | CY035894        |
| A/red-neckedstint/WesternAus/4126/80       | CY033160        | CY033159        | CY033158        | CY033153        | CY033156        | CY033155        | CY033154        | CY033157        |
| A/red-neckedstint/WesternAus/4915/84       | CY029904        | CY029903        | CY029902        | CY029897        | CY029900        | CY029899        | CY029898        | CY029901        |
| A/red-neckedstint/WesternAus/4923/83       | CY028290        | CY028289        | CY028288        | CY028283        | CY028286        | CY028285        | CY028284        | CY028287        |
| A/red-neckedstint/WesternAus/5745/82       | CY029880        | CY029879        | CY029878        | CY029873        | CY029876        | CY029875        | CY029874        | CY029877        |
| A/ruddyshelduck/Mongolia/37/05             | GQ907341        | GQ907340        | GQ907339        | GQ907334        | GQ907337        | GQ907336        | GQ907335        | GQ907338        |
| A/ruddyshelduck/Mongolia/P52/05            | GQ907349        | GQ907348        | GQ907347        | GQ907342        | GQ907345        | GQ907344        | GQ907343        | GQ907346        |
| A/sharp-tailedsandpiper/Aus/10/04          | CY029888        | CY029887        | CY029886        | CY029881        | CY029884        | CY029883        | CY029882        | CY029885        |
| A/sharp-tailedsandpiper/Aus/6/04           | CY025204        | CY025203        | CY025202        | CY025197        | CY025200        | CY025199        | CY025198        | CY025201        |
| A/shearwater/Aus/1/1973                    | CY005827        | CY005826        | CY005825        | CY014656        | CY014658        | CY014657        | CY005823        | CY005824        |
| A/shearwater/Aus/405/78                    | CY005665        | CY005664        | CY005663        | CY014621        | CY005661        | CY014622        | CY005660        | CY005662        |
| A/shearwater/Aus/751/75                    | CY045262        | CY045261        | CY045260        | CY045255        | CY045258        | CY045257        | CY045256        | CY045259        |
| A/shoveler/NL/19/99                        | CY005858        | CY005857        | CY005856        | CY014719        | CY005854        | CY005853        | CY005852        | CY005855        |
| A/slaty-backedgull/Japan/6KS0185/06        | CY079298        | CY079297        | CY079296        | CY079291        | CY079294        | CY079293        | CY079292        | CY079295        |
| A/spotbillduck/Xuvi/6/05                   | GQ203122        | GQ203123        | GQ203124        | GQ184327        | GQ169500        | GQ184332        | GQ219713        | GQ219714        |
| A/swan/Slovenia/53/09                      | HQ283354        | HQ283355        | HQ283356        | HQ283357        | HQ283358        | HQ283359        | HQ283360        | HQ283361        |
| A/teal/Germany/WV632/05                    | CY061882        | CY061883        | CY061884        | CY061885        | CY061886        | CY061887        | CY061888        | CY061889        |
| A/teal/Italy/3812/05                       | CY022652        | CY022651        | CY022650        | CY022645        | CY022648        | CY022647        | CY022646        | CY022649        |
| A/teal/Italy/3931-38/05                    | CY022644        | CY022643        | CY022642        | CY022637        | CY022640        | CY022639        | CY022638        | CY022641        |
| A/tern/Aus/752/75                          | CY077659        | CY077658        | CY077657        | CY077654        | CY077655        | CY077654        | CY077653        | CY077656        |
| A/tuftedduck/PT/13771/06                   | HM849010        | HM849009        | HM849008        | HM849003        | HM849006        | HM849005        | HM849004        | HM849007        |
| A/turnstone/NL/1/07                        | <b>CY041353</b> | <b>CY041352</b> | <b>CY041351</b> | <b>CY041346</b> | <b>CY041349</b> | <b>CY041348</b> | <b>CY041347</b> | <b>CY041350</b> |
| A/wedge-tailedshearwater/WesternAus/405/77 | CY028659        | CY028658        | CY028657        | CY028652        | CY028655        | CY028654        | CY028653        | CY028656        |
| A/whistlingswan/Shimane/468/88             | GQ176105        | GQ176106        | GQ176107        | GQ176112        | GQ176109        | GQ176110        | GQ176111        | GQ176108        |
| A/whitefrontedgoose/NL/1/99                | <b>CY060428</b> | <b>CY060429</b> | <b>CY060430</b> | <b>CY060431</b> | <b>CY060432</b> | <b>CY060433</b> | <b>CY060434</b> | <b>CY060435</b> |
| A/whitefrontedgoose/NL/2/99                | <b>CY060436</b> | <b>CY060437</b> | <b>CY060438</b> | <b>CY060439</b> | <b>CY060440</b> | <b>CY060441</b> | <b>CY060442</b> | <b>CY060443</b> |
| A/whooperswan/Mongolia/232/05              | GQ907357        | GQ907356        | GQ907355        | GQ907350        | GQ907353        | GQ907352        | GQ907351        | GQ907354        |

\*Sequences submitted to Genbank are depicted in bold

#Submitted as draft sequence, due to low coverage, low quality, ambiguities, frameshifts, gaps, or other problems.

**Table S2. Statistically supported migration rates between regions for the whole-genome dataset.**

|                    | PB2                               | PB1                               | PA                                | HA                                 | NP                                | NA                                | M                                 | NS                                |
|--------------------|-----------------------------------|-----------------------------------|-----------------------------------|------------------------------------|-----------------------------------|-----------------------------------|-----------------------------------|-----------------------------------|
| East to West       | 0.64 <sup>†</sup><br>(0.01:1.62)  |                                   | <b>2.61</b><br><b>(0.29:5.35)</b> | <b>1.58</b><br><b>(0.10:3.47)</b>  |                                   |                                   | 1.43<br>(0.03:3.24)               | <b>2.05</b><br><b>(0.44:4.16)</b> |
| East to Central    | <b>0.93</b><br><b>(0.07:2.11)</b> | <b>0.87</b><br><b>(0.05:1.99)</b> | 0.76<br>(0.04:1.74)               | 0.65<br>(0.00:1.55)                | <b>1.48</b><br><b>(0.16:3.08)</b> |                                   |                                   | 0.71<br>(0.02:1.71)               |
| East to Oceania    | <b>2.55</b><br><b>(0.67:4.81)</b> | <b>1.86</b><br><b>(0.40:3.67)</b> | <b>1.45</b><br><b>(0.24:3.01)</b> | <b>1.59</b><br><b>(0.19:3.27)</b>  | <b>1.37</b><br><b>(0.16:3.08)</b> | 0.89<br>(0.00:1.97)               | 1.15<br>(0.04:2.56)               |                                   |
| West to Central    | <b>1.4</b><br><b>(0.25:2.81)</b>  | <b>1.16</b><br><b>(0.13:2.40)</b> | <b>1.23</b><br><b>(0.18:2.54)</b> | <b>0.866</b><br><b>(0.12:1.84)</b> | <b>1</b><br><b>(0.01:2.21)</b>    | <b>0.97</b><br><b>(0.78:1.98)</b> | <b>1.42</b><br><b>(0.16:2.91)</b> | <b>1.6</b><br><b>(0.37:3.11)</b>  |
| West to East       | <b>1.58</b><br><b>(0.35:3.12)</b> | <b>2.12</b><br><b>(0.39:4.27)</b> |                                   | <b>2.05</b><br><b>(0.47:3.96)</b>  | 2.13<br>(0.11:4.27)               | <b>2.52</b><br><b>(0.56:4.69)</b> | <b>1.85</b><br><b>(0.24:3.83)</b> | <b>1.88</b><br><b>(0.39:3.70)</b> |
| West to Oceania    |                                   |                                   |                                   |                                    |                                   | 0.73<br>(0.00:1.66)               |                                   | 0.87<br>(0.02:1.90)               |
| Central to West    |                                   |                                   |                                   |                                    |                                   |                                   |                                   |                                   |
| Central to East    |                                   |                                   |                                   | 0.81<br>(0.00:1.99)                |                                   |                                   | 1.06<br>(0.00:2.66)               |                                   |
| Central to Oceania |                                   |                                   |                                   |                                    |                                   |                                   |                                   |                                   |
| Oceania to West    |                                   |                                   |                                   | 1.16<br>(0.02:2.35)                |                                   | <b>0.95</b><br><b>(0.16:1.95)</b> |                                   |                                   |
| Oceania to Central |                                   |                                   |                                   |                                    |                                   |                                   |                                   |                                   |
| Oceania to East    |                                   |                                   |                                   |                                    | 0.6<br>(0.00:1.52)                |                                   | 0.92<br>(0.00:2.19)               |                                   |

\* Only migration rates with a BF higher than 8 are shown

<sup>†</sup> Migration rates with a BF higher than 100 are depicted in bold

## Legends

Figure S1. Maximum likelihood trees of (a) PB2 and PB2, (b) PA and HA, (c) NP and NA and (d) MP and NS, displaying the genetic diversity of avian influenza A viruses in Eurasian wild birds. The taxa color indicates the bird species group from which the sample was isolated: Dabbling ducks – blue, diving and other ducks – pink, geese – orange, swans – green, fowl – black, gulls and other shorebirds – red.

Figure S2. Maximum likelihood trees of (a) PB2 and PB2, (b) PA and HA, (c) NP and NA and (d) MP and NS, displaying the genetic diversity in different locations in Eurasia. The taxa color indicates the regional location from where the sample was isolated: Oceania - cyan, East Eurasia - red, Central Eurasia - green, West Eurasia – blue.

Figure S3.

Maximum clade credibility (MCC) trees, summarizing the results of the Bayesian phylogenetic inference of (a) PB2 and PB2, (b) PA and HA, (c) NP and NA and (d) MP and NS, displaying the genetic diversity in different locations in Eurasia. The taxa color indicates the regional location from where the sample was isolated: Oceania - cyan, Central Eurasia - green, East Eurasia - red, West Eurasia - blue.

The scale bar represents time in years

Figure S1a

PB2

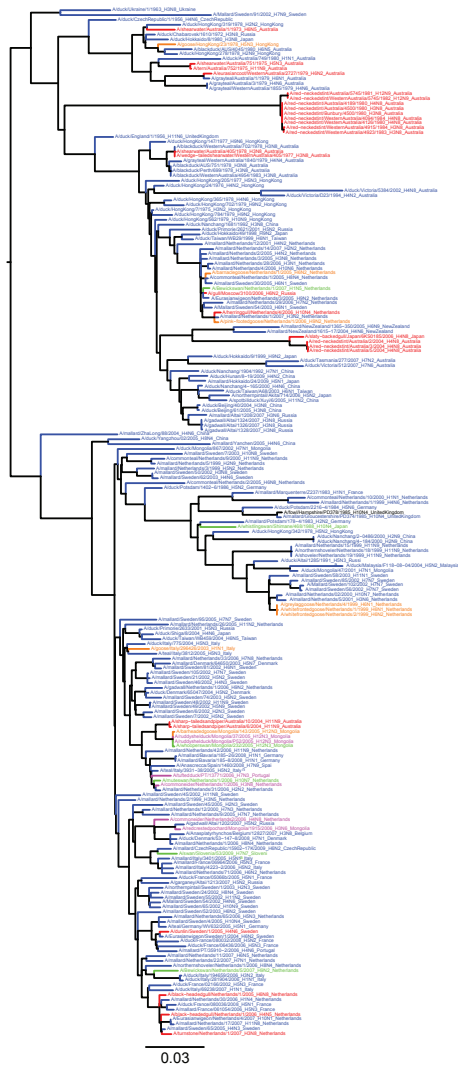

PB1

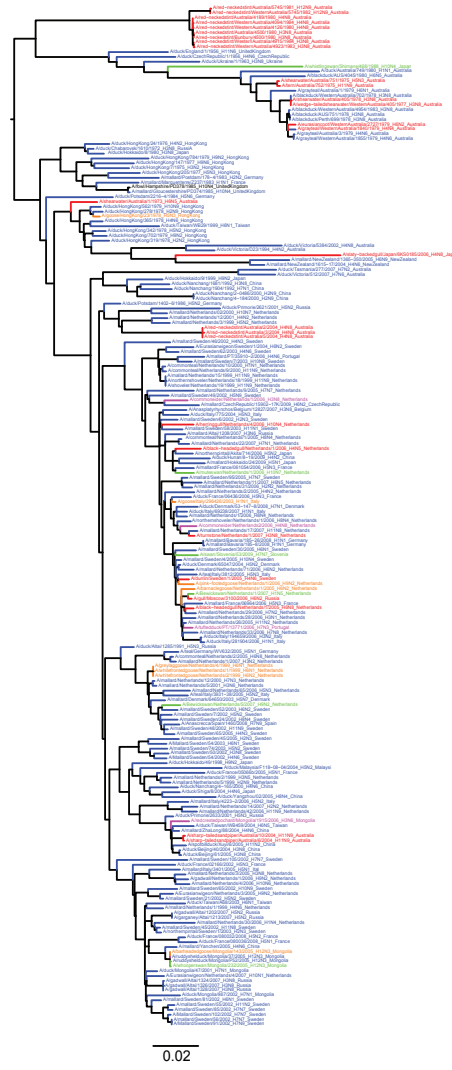

Figure S1b

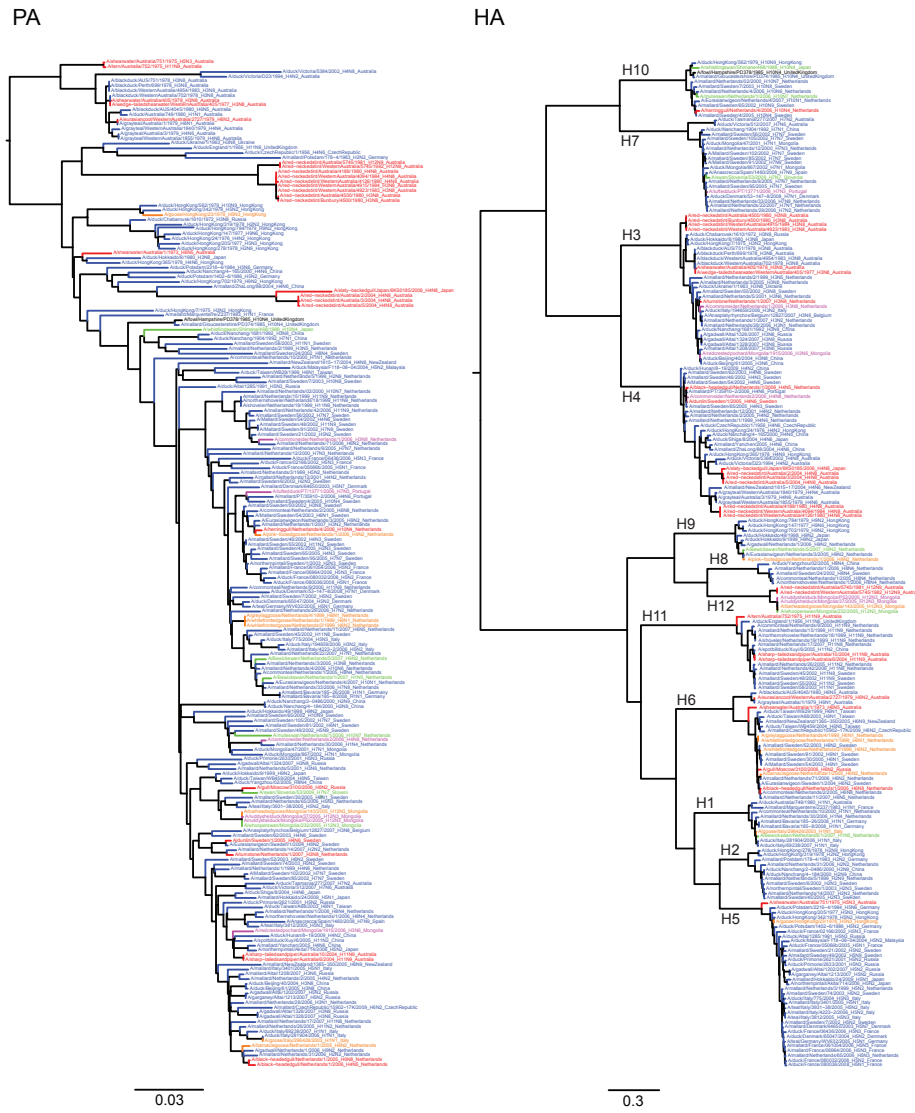

Figure S1c

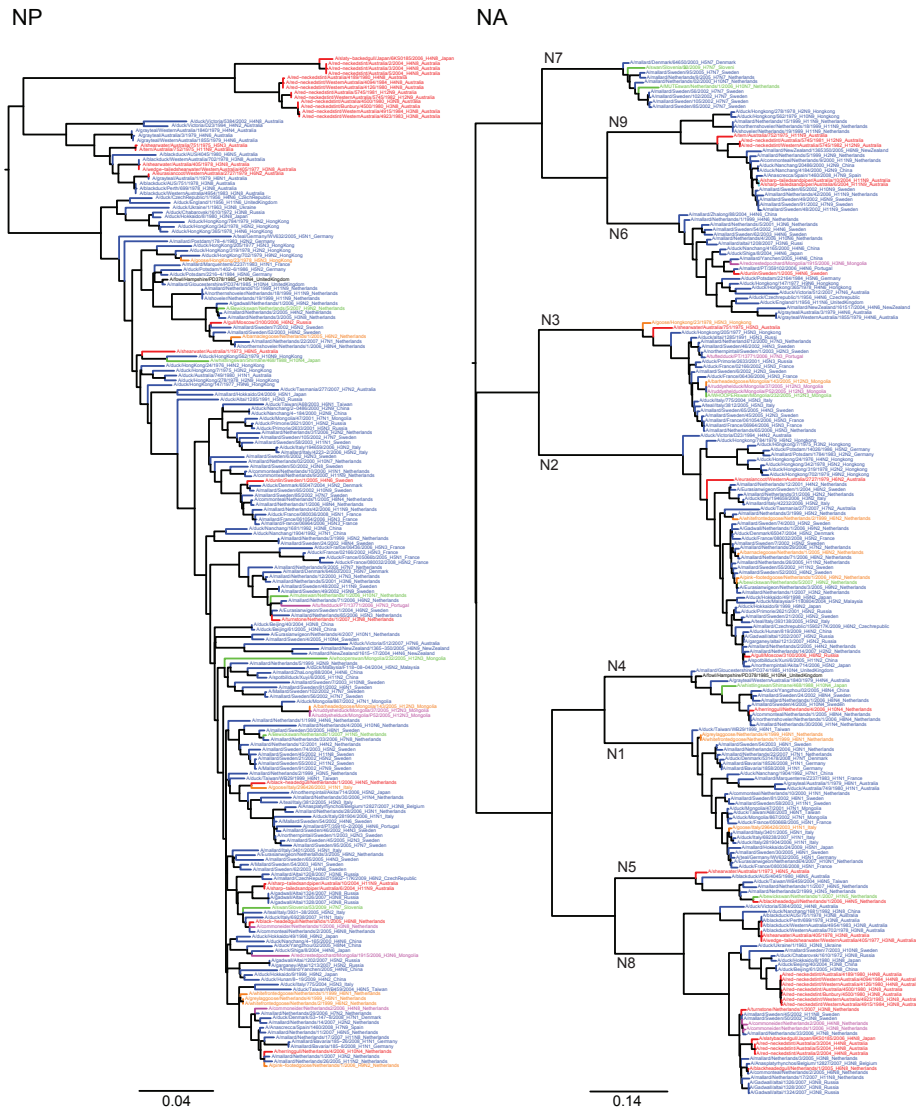



Figure S1d

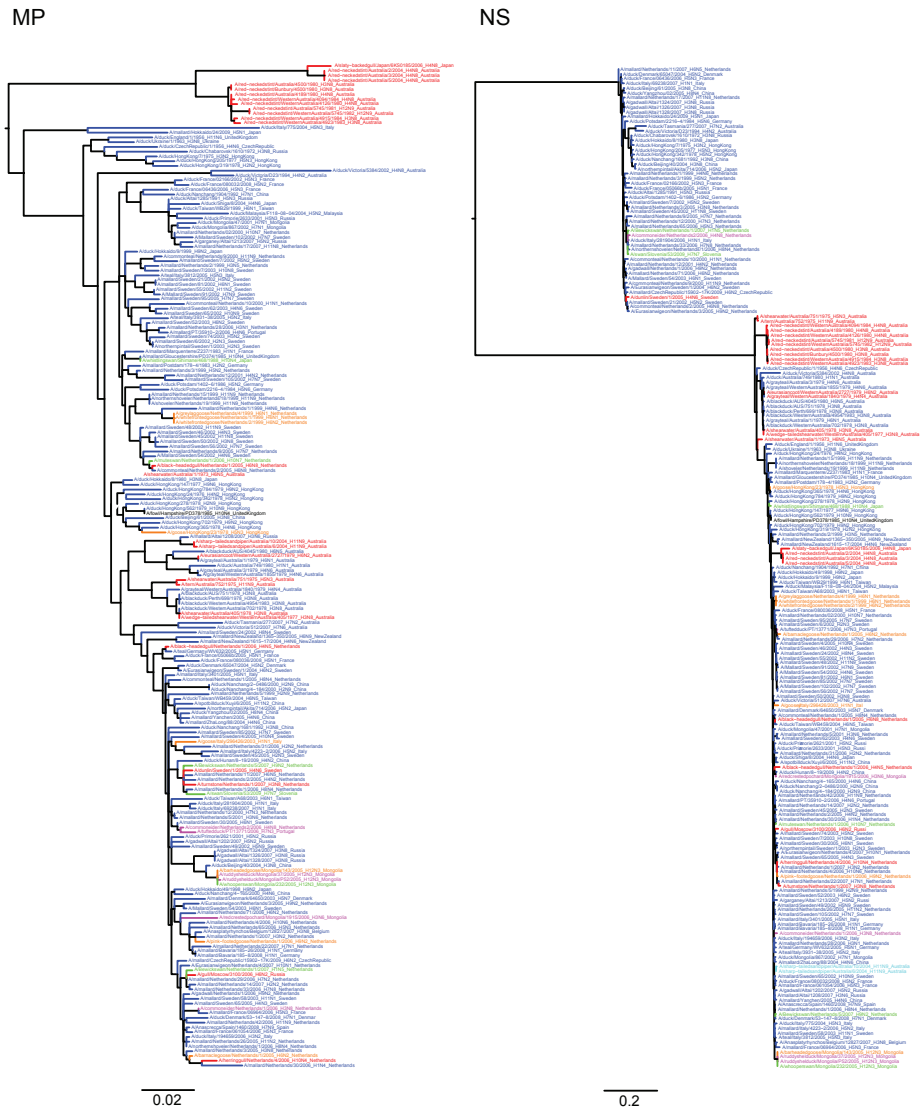

Figure S2a

PB2

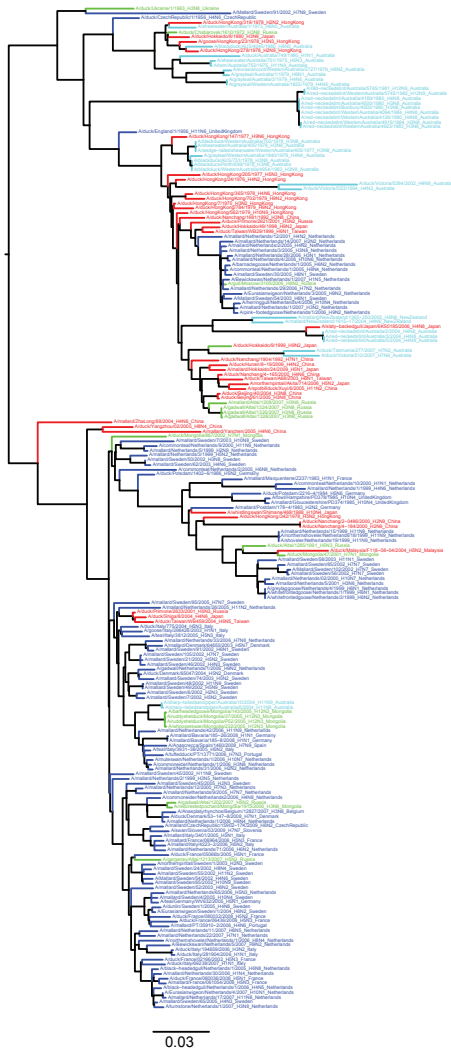

PB1

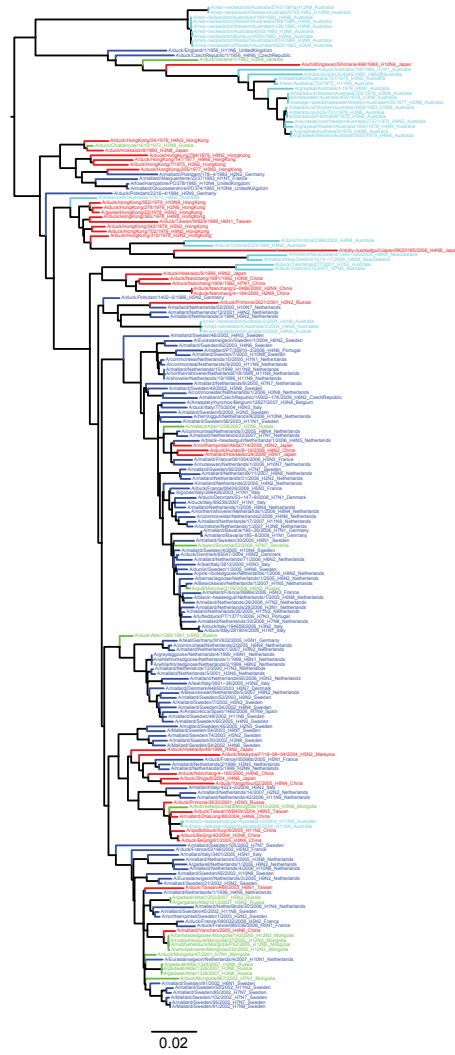

Figure S2b

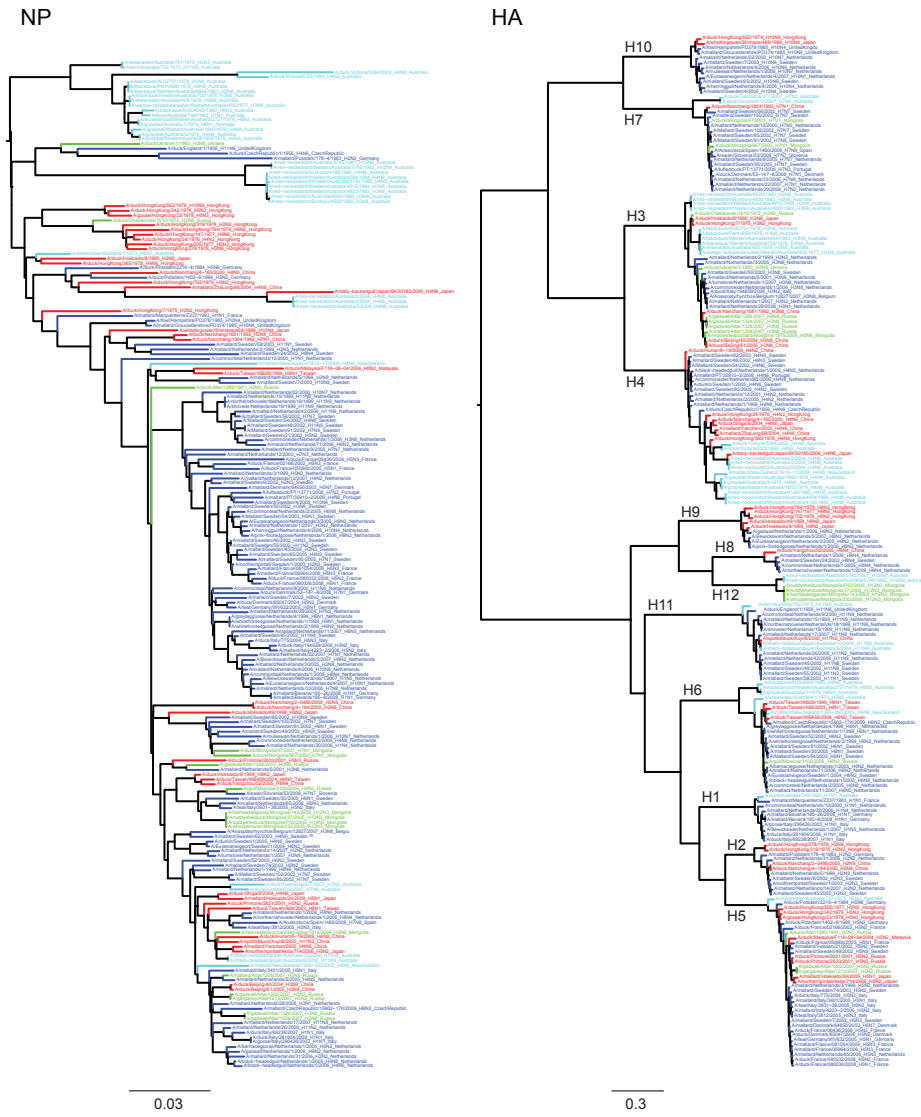

Figure S2c

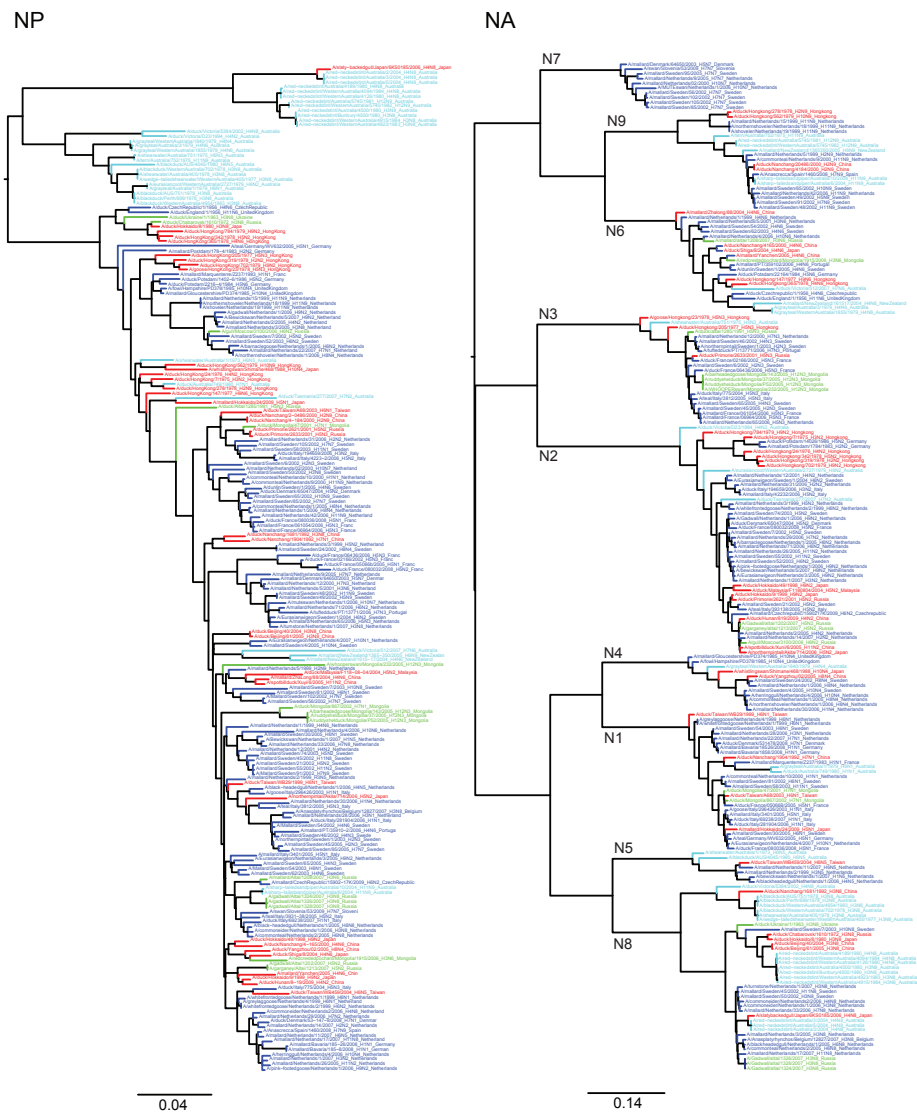

Figure S2d

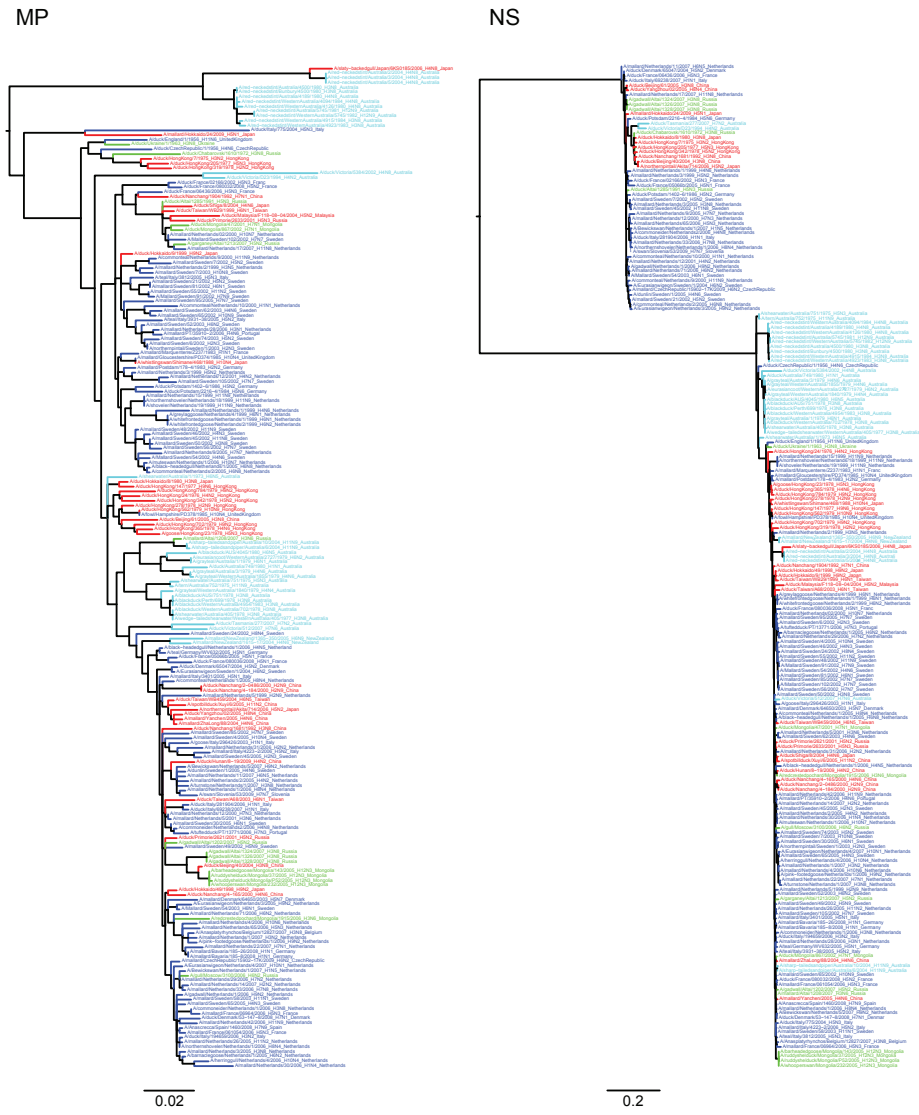

Figure S3a

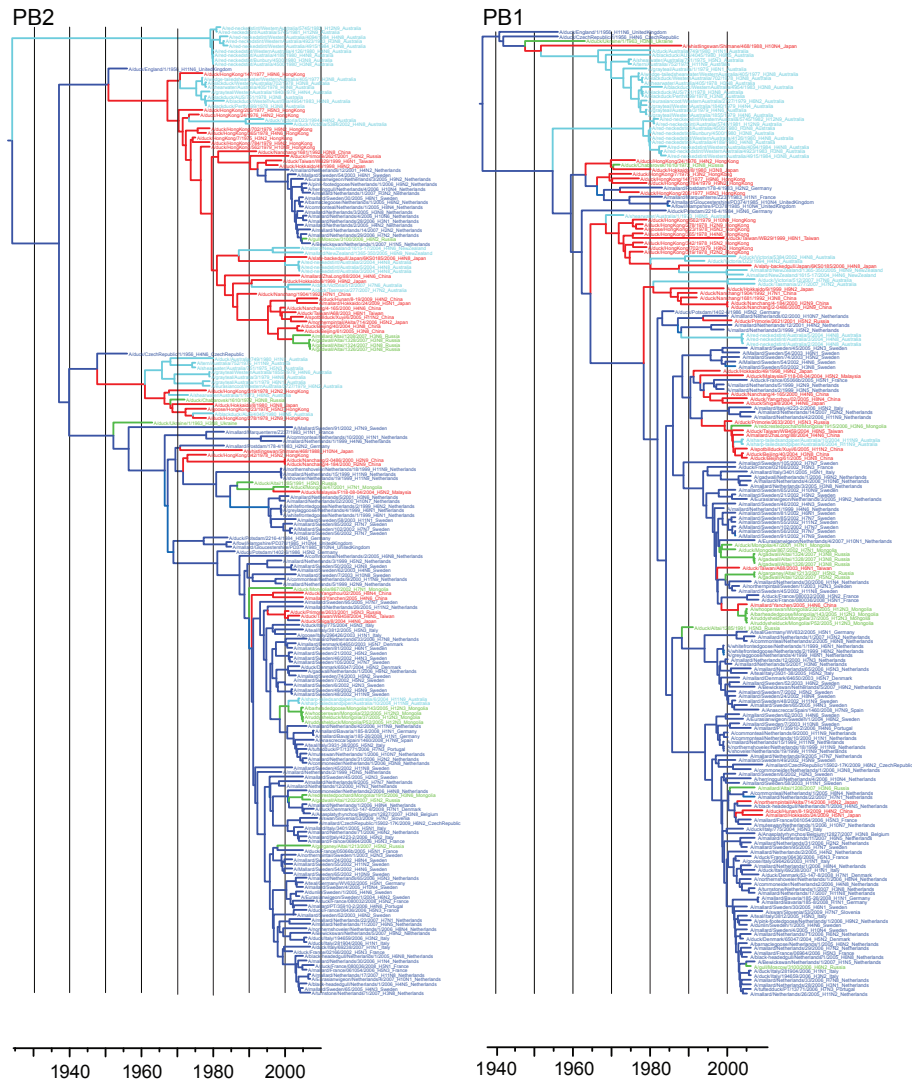

Figure S3b

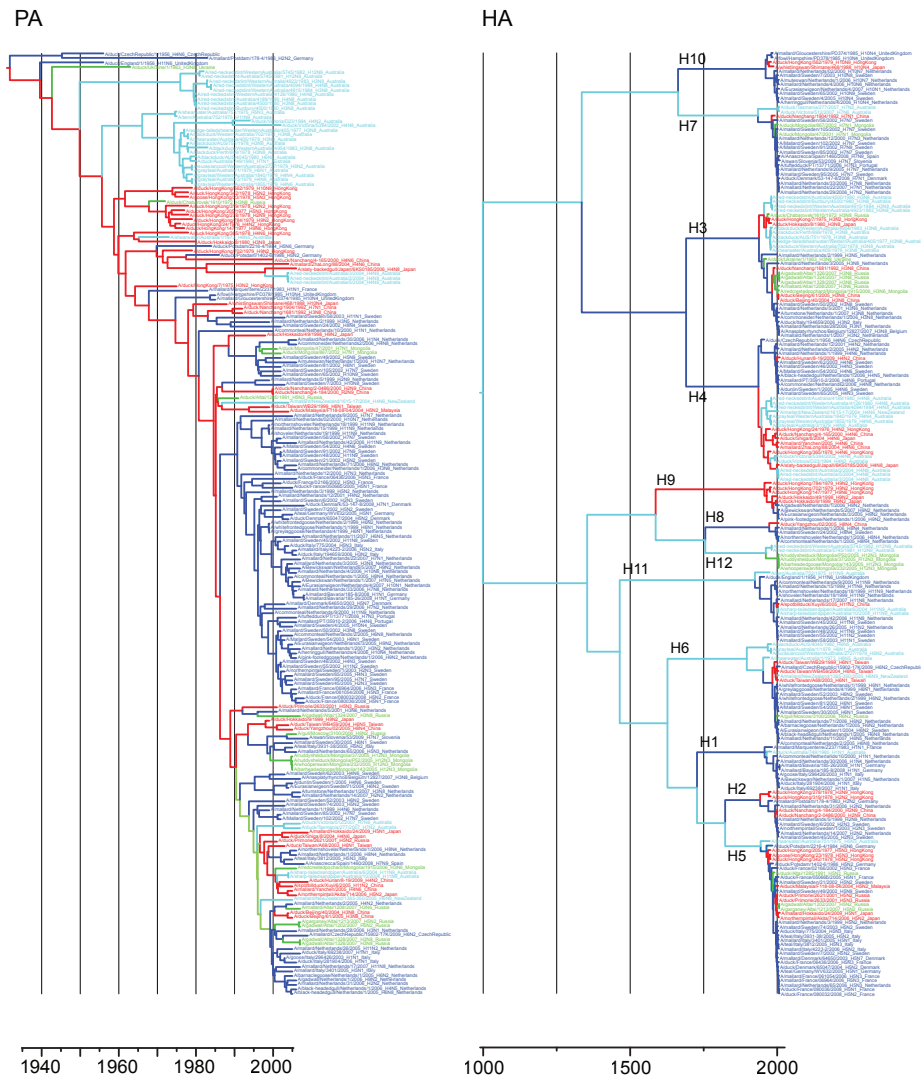

Figure S3c

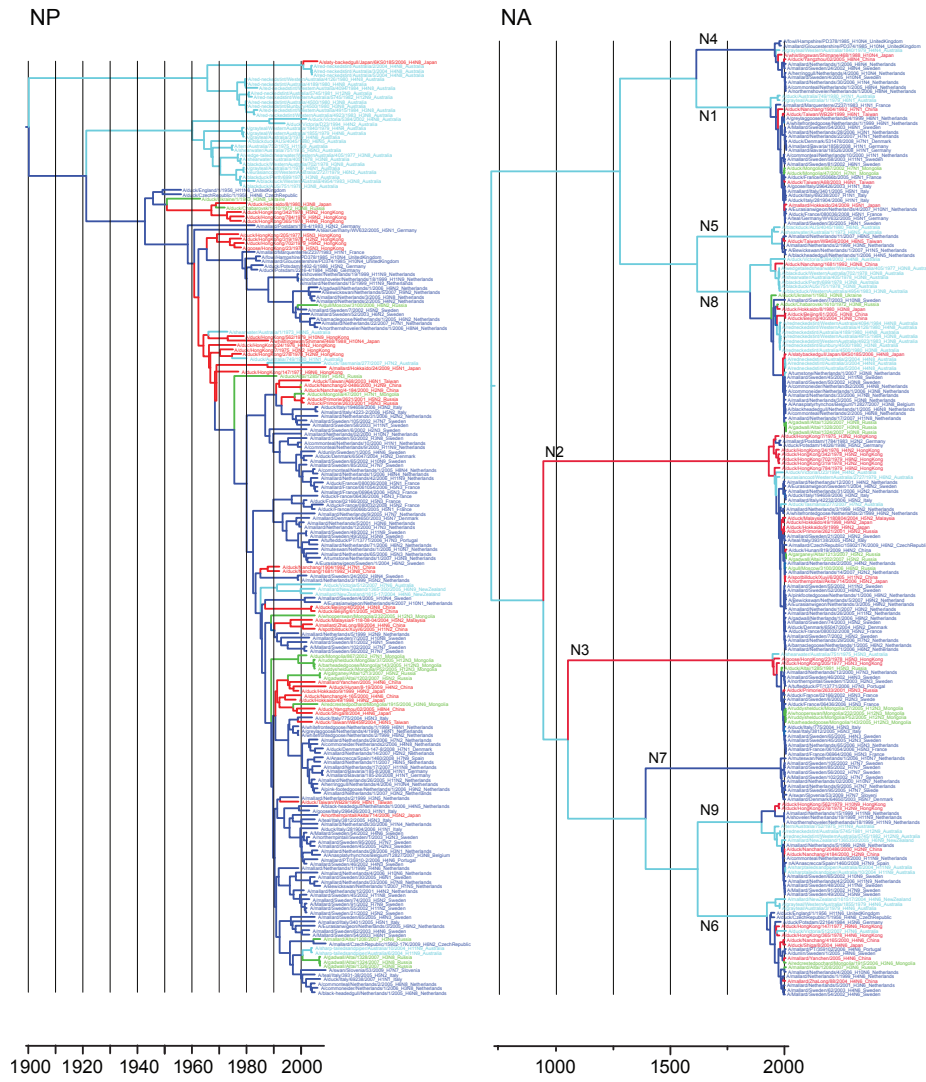



Figure S3d

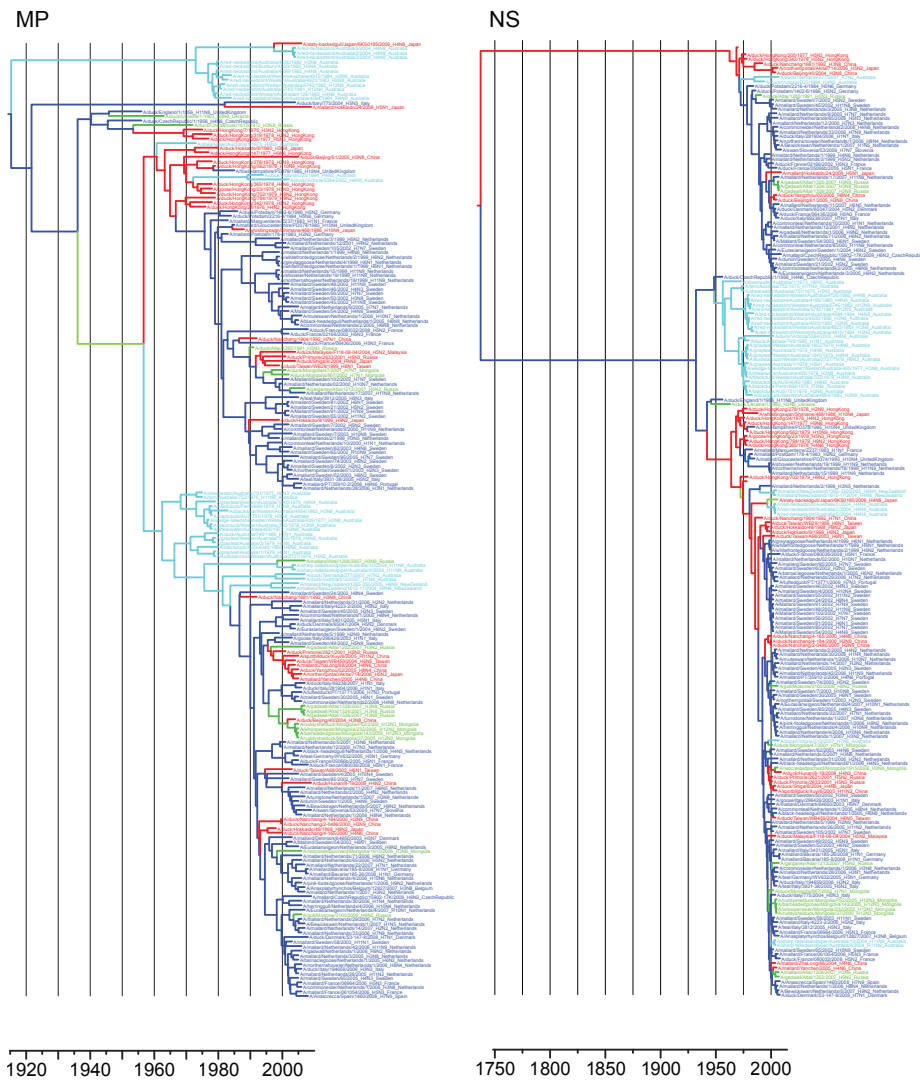

Supplement: vir-96-08-2050-s001.pdf [file vir-96-08-2050-s001.pdf]
